# Supplementary material for: Influence of a porous MOF support on the catalytic performance of Eu-polyoxometalate based materials: desulfurization of a model diesel
Source: Royal Society of Chemistry journal article supplement (doi:10.1039/c5cy01110h), 2015-10-08
Supplement: c5cy01110h1.pdf [file c5cy01110h1.pdf]

# ELECTRONIC SUPPORTING INFORMATION

## Influence of porous MOF support in the catalytic performance of Eu-polyoxometalate based materials: desulfurization of model diesel

*Carlos M. Granadeiro,<sup>a</sup> Lucie S. Nogueira,<sup>a</sup> Diana Julião,<sup>a</sup> Fátima Mirante,<sup>a</sup>*

*Duarte*

*Ananias,<sup>b</sup> Salette S. Balula<sup>a,\*</sup> and Luís Cunha-Silva<sup>a,\*</sup>*

<sup>a</sup> REQUIMTE / LAQV & Department of Chemistry and Biochemistry, Faculty of Sciences,  
University of Porto, 4169-007 Porto, Portugal

<sup>b</sup> CICECO, Department of Chemistry, University of Aveiro, 3810-193 Aveiro, Portugal

\* Corresponding author: *E-mail: sbalula@fc.up.pt, l.cunha.silva@fc.up.pt.*

*Tel: +351 220402576. Fax +351220402659.*

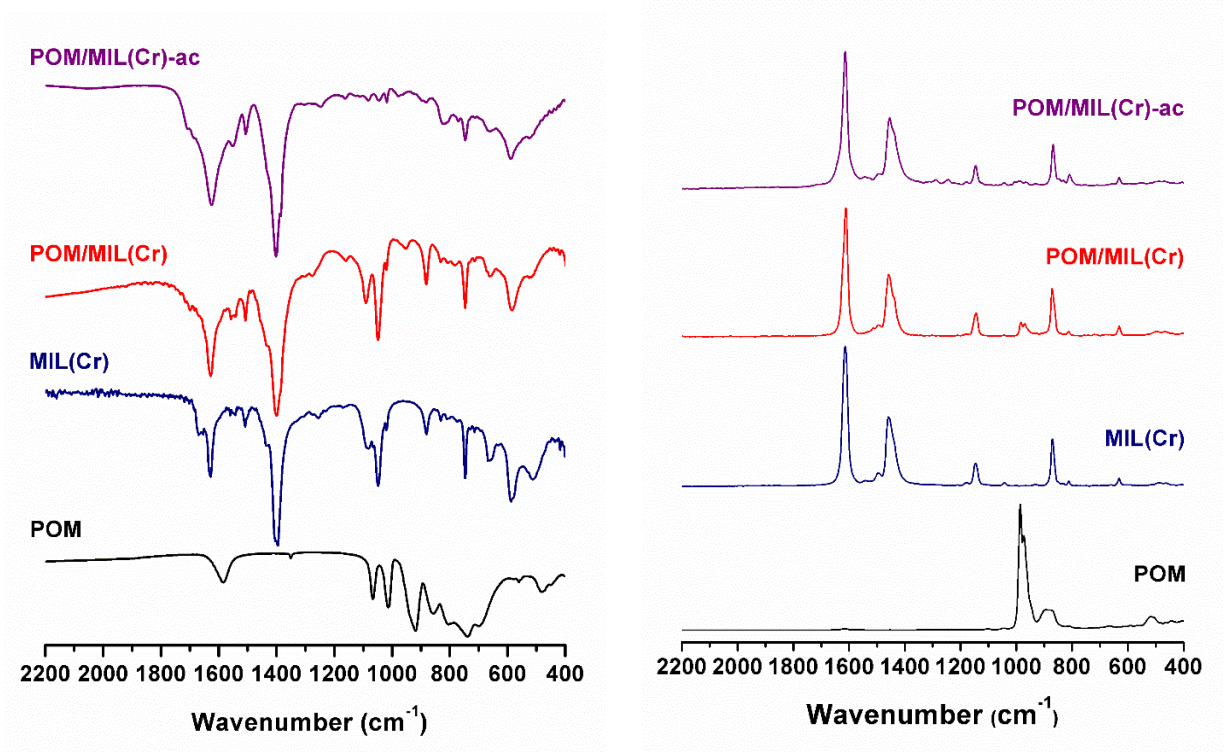

**Figure S1** - FT-IR (left) and FT-Raman (right) spectra of the isolated POM, the MIL-101(Cr) support and corresponding composite before and after catalysis.

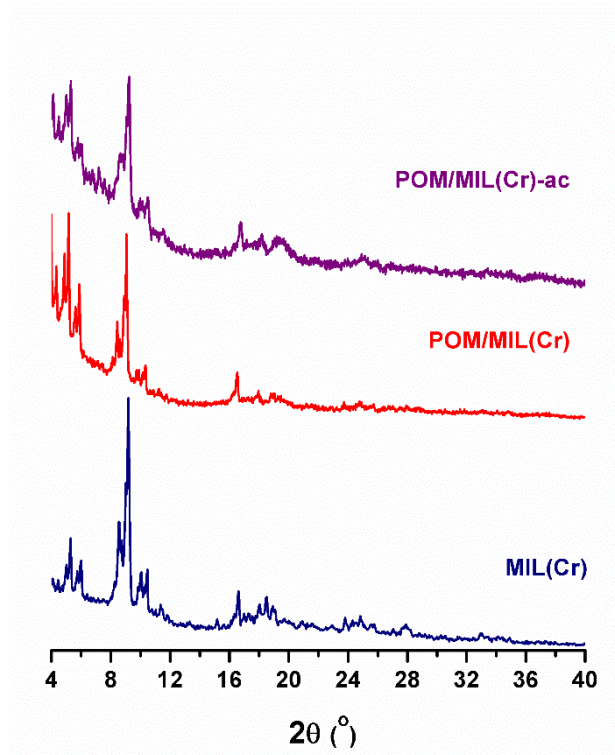

**Figure S2** - Powder XRD patterns of the MIL-101(Cr) support and corresponding POM/MIL(Cr) composite before and after catalysis (ac).

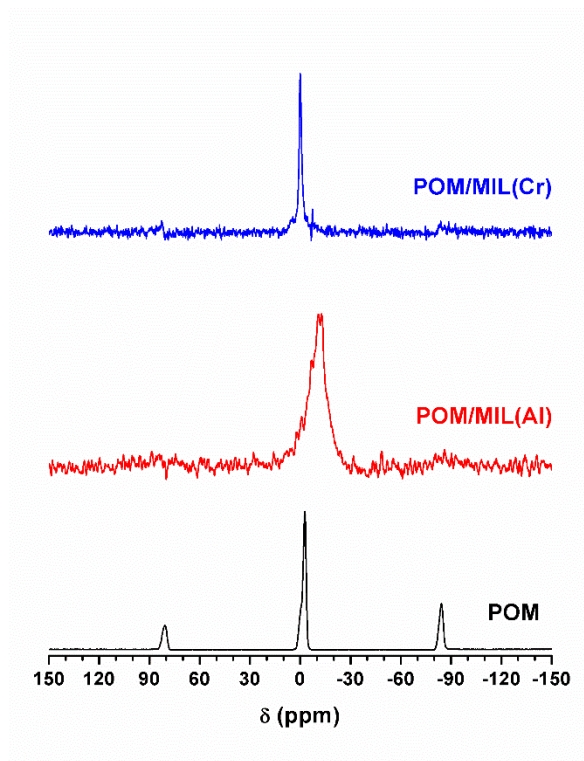

**Figure S3** - Solid-state  $^{31}\text{P}$  MAS NMR spectra of the isolated POM and composite materials.

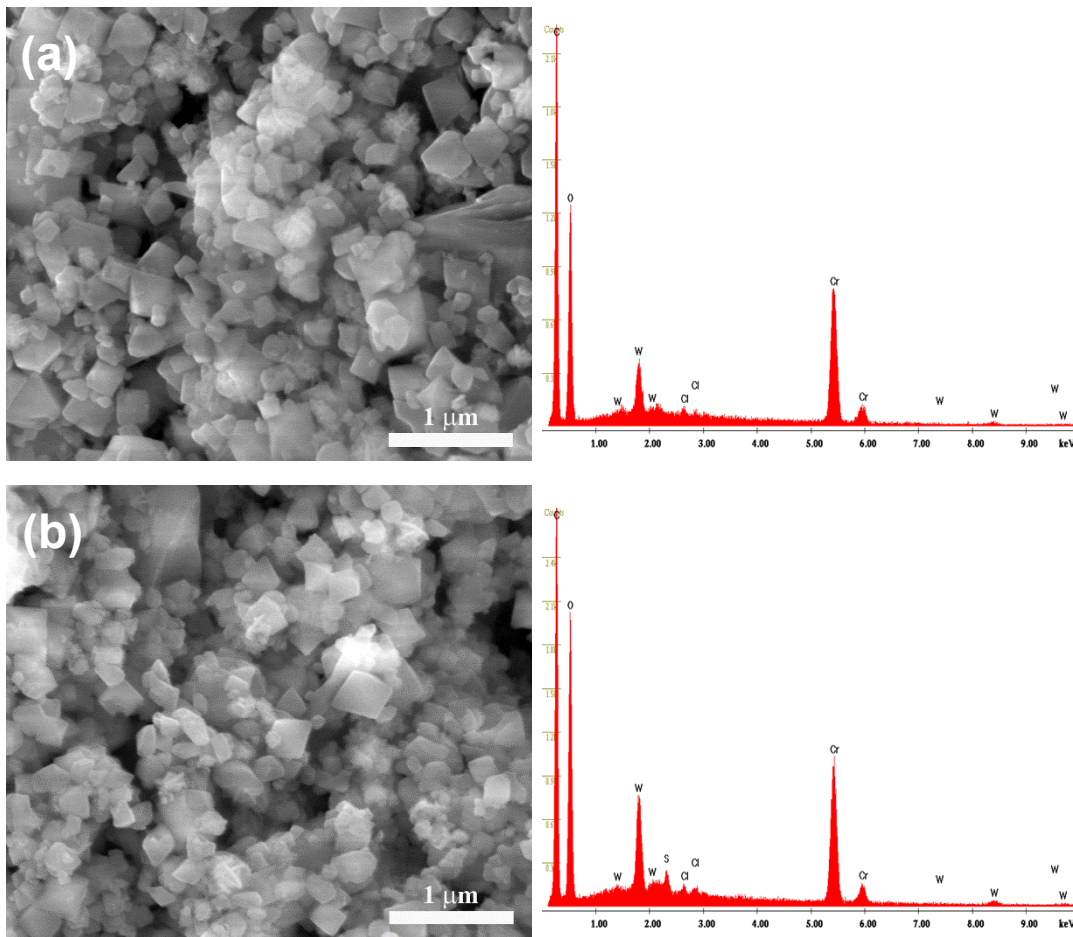

**Figure S4** - SEM images and EDS spectra of POM/MIL(Cr) composite (a) as-synthesized and (b) after catalysis.
